# Supplementary material for: Heterogeneity in Neutrophil Microparticles Reveals Distinct Proteome and Functional Properties
Source: PubMed Central journal article supplement (PMC3734580; doi:10.1074/mcp.m113.028589), 2013-05-08
Supplement: supp_M113.028589_mcp.M113.028589-1.pdf [file supp_M113.028589_mcp.M113.028589-1.pdf]

ImP Microparticles

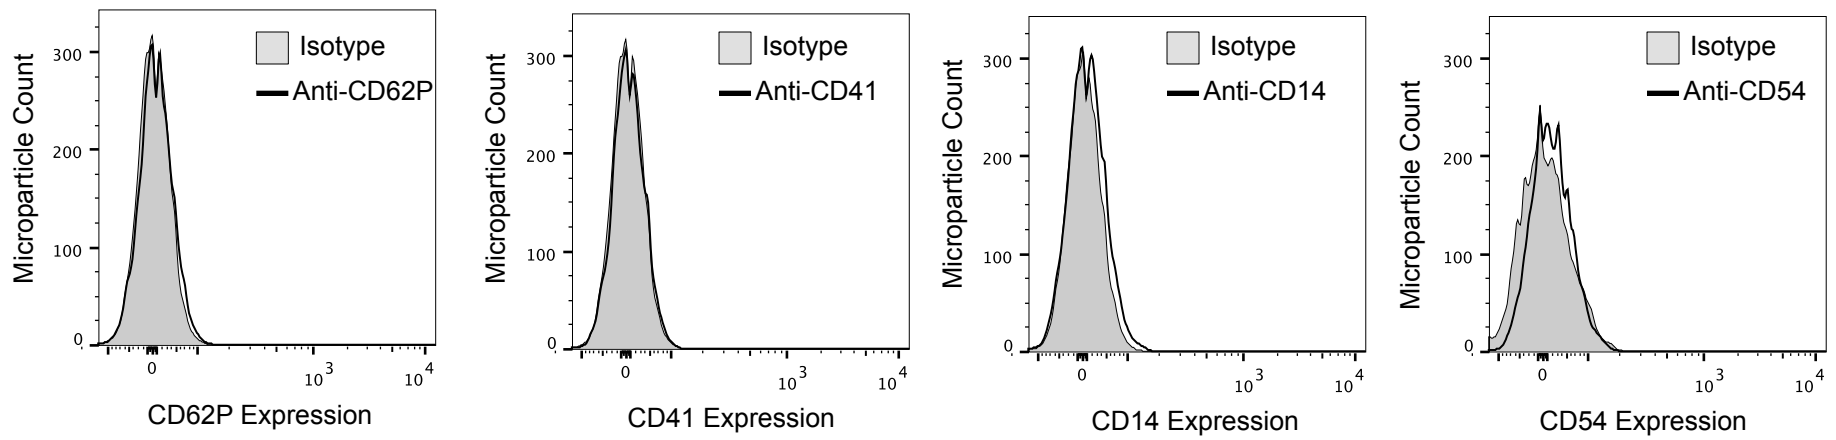

FIP Microparticles

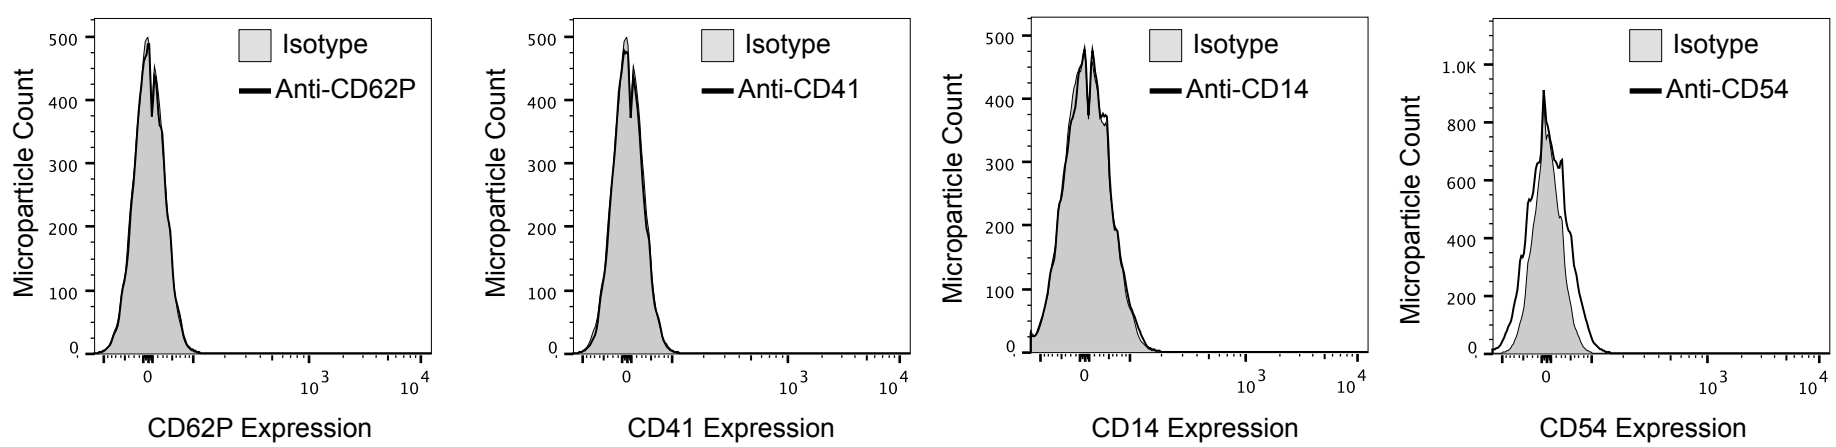

**Supplementary Figure 1: No evidence for platelet, endothelial and monocyte microparticles in the neutrophil microparticle preparations.** Microparticles were suspended in PBS (containing calcium and magnesium) and incubated with mouse anti human -CD62P, CD41 (platelet microparticle markers), CD54 (endothelial microparticle marker) or anti-CD14 (monocyte microparticle marker) conjugated antibodies. Staining was then assessed using a FACS Canto II and data analysed using FlowJo software. Results are representative of n=5 microparticle preparations.

A

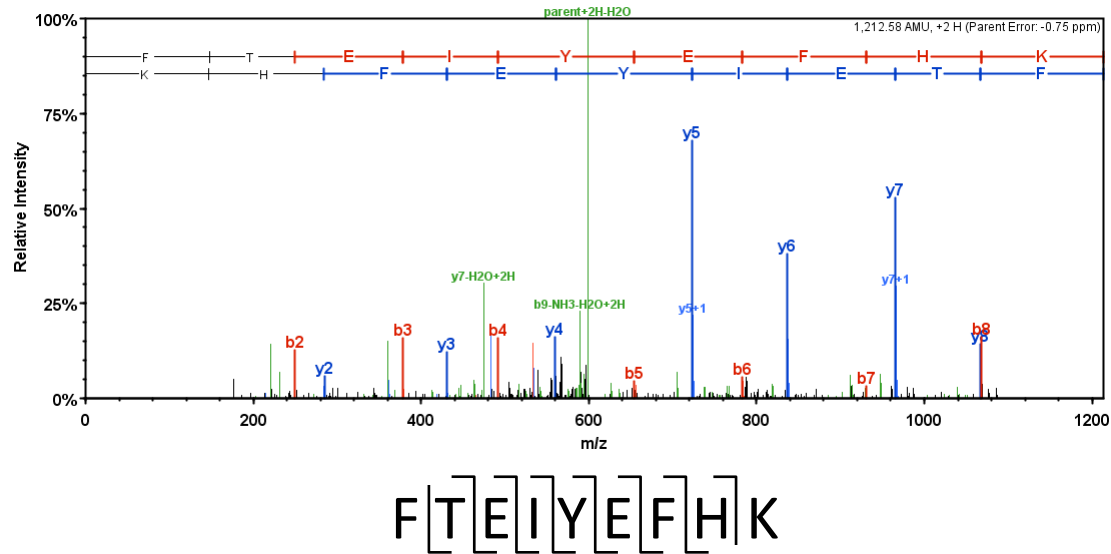

B

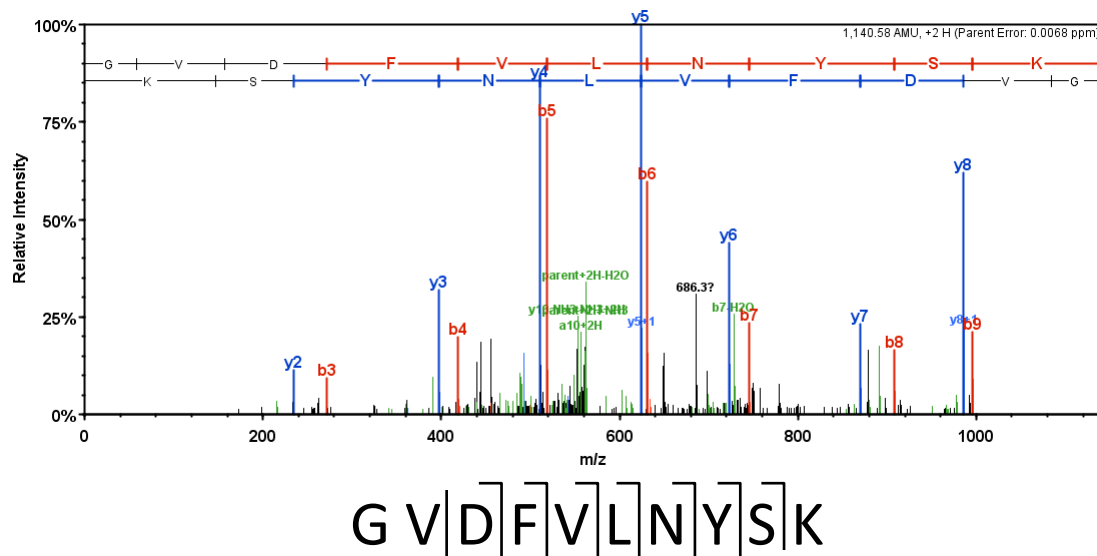

**Supplementary Figure 2: Evidence for the presence of NCF-1 and 5-lipoxygenase in FIP microparticles.** Mass spectra employed for the identification of (A) NCF-1 and (B) 5 lipoxygenase in FIP microparticles.
